# Supplementary figures and images for: Group B Streptococcus-Induced Macropinocytosis Contributes to Bacterial Invasion of Brain Endothelial Cells
Source: MDPI journal article supplement (doi:10.3390/pathogens11040474), 2022-04-15

**A**

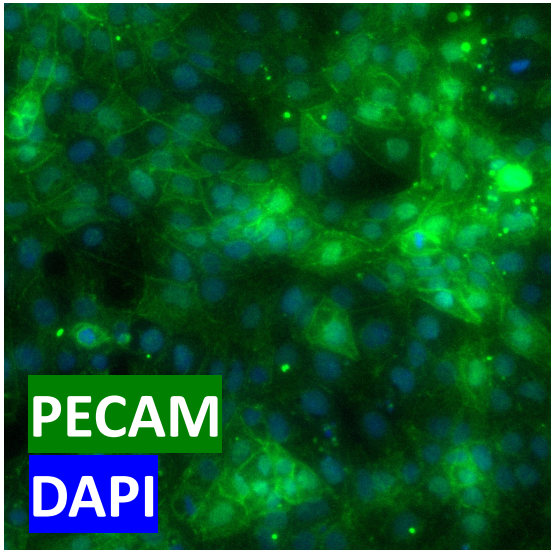

**B**

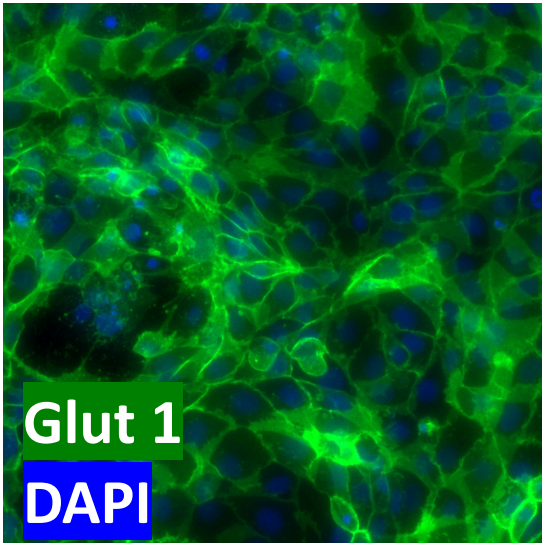

**C**

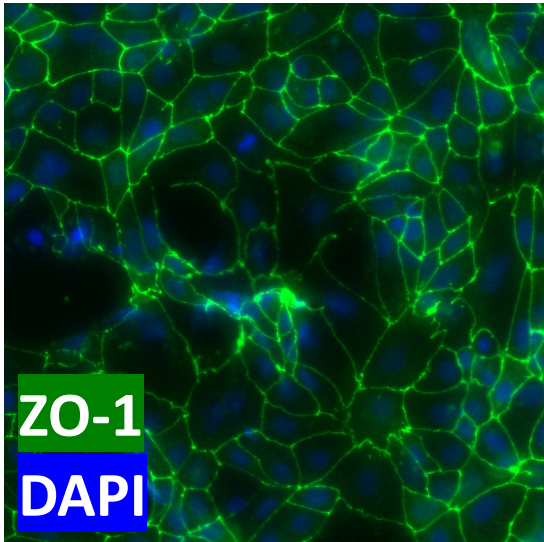

**D**

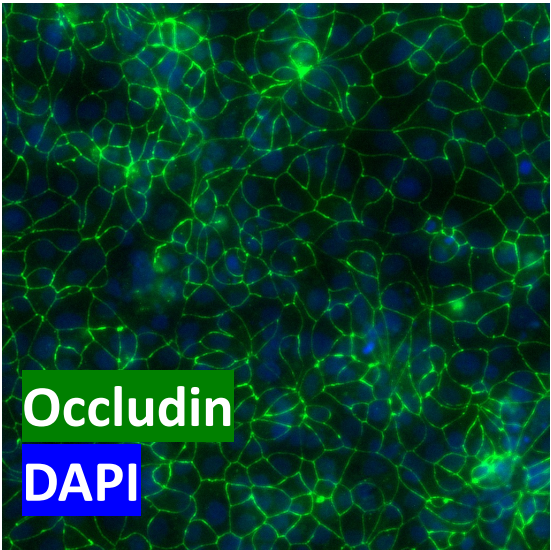

**E**

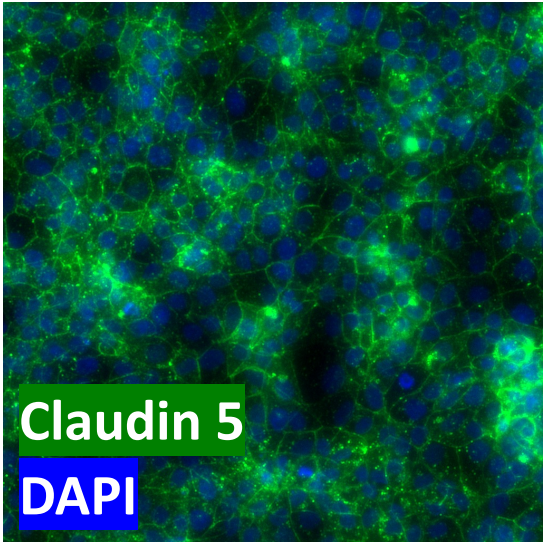

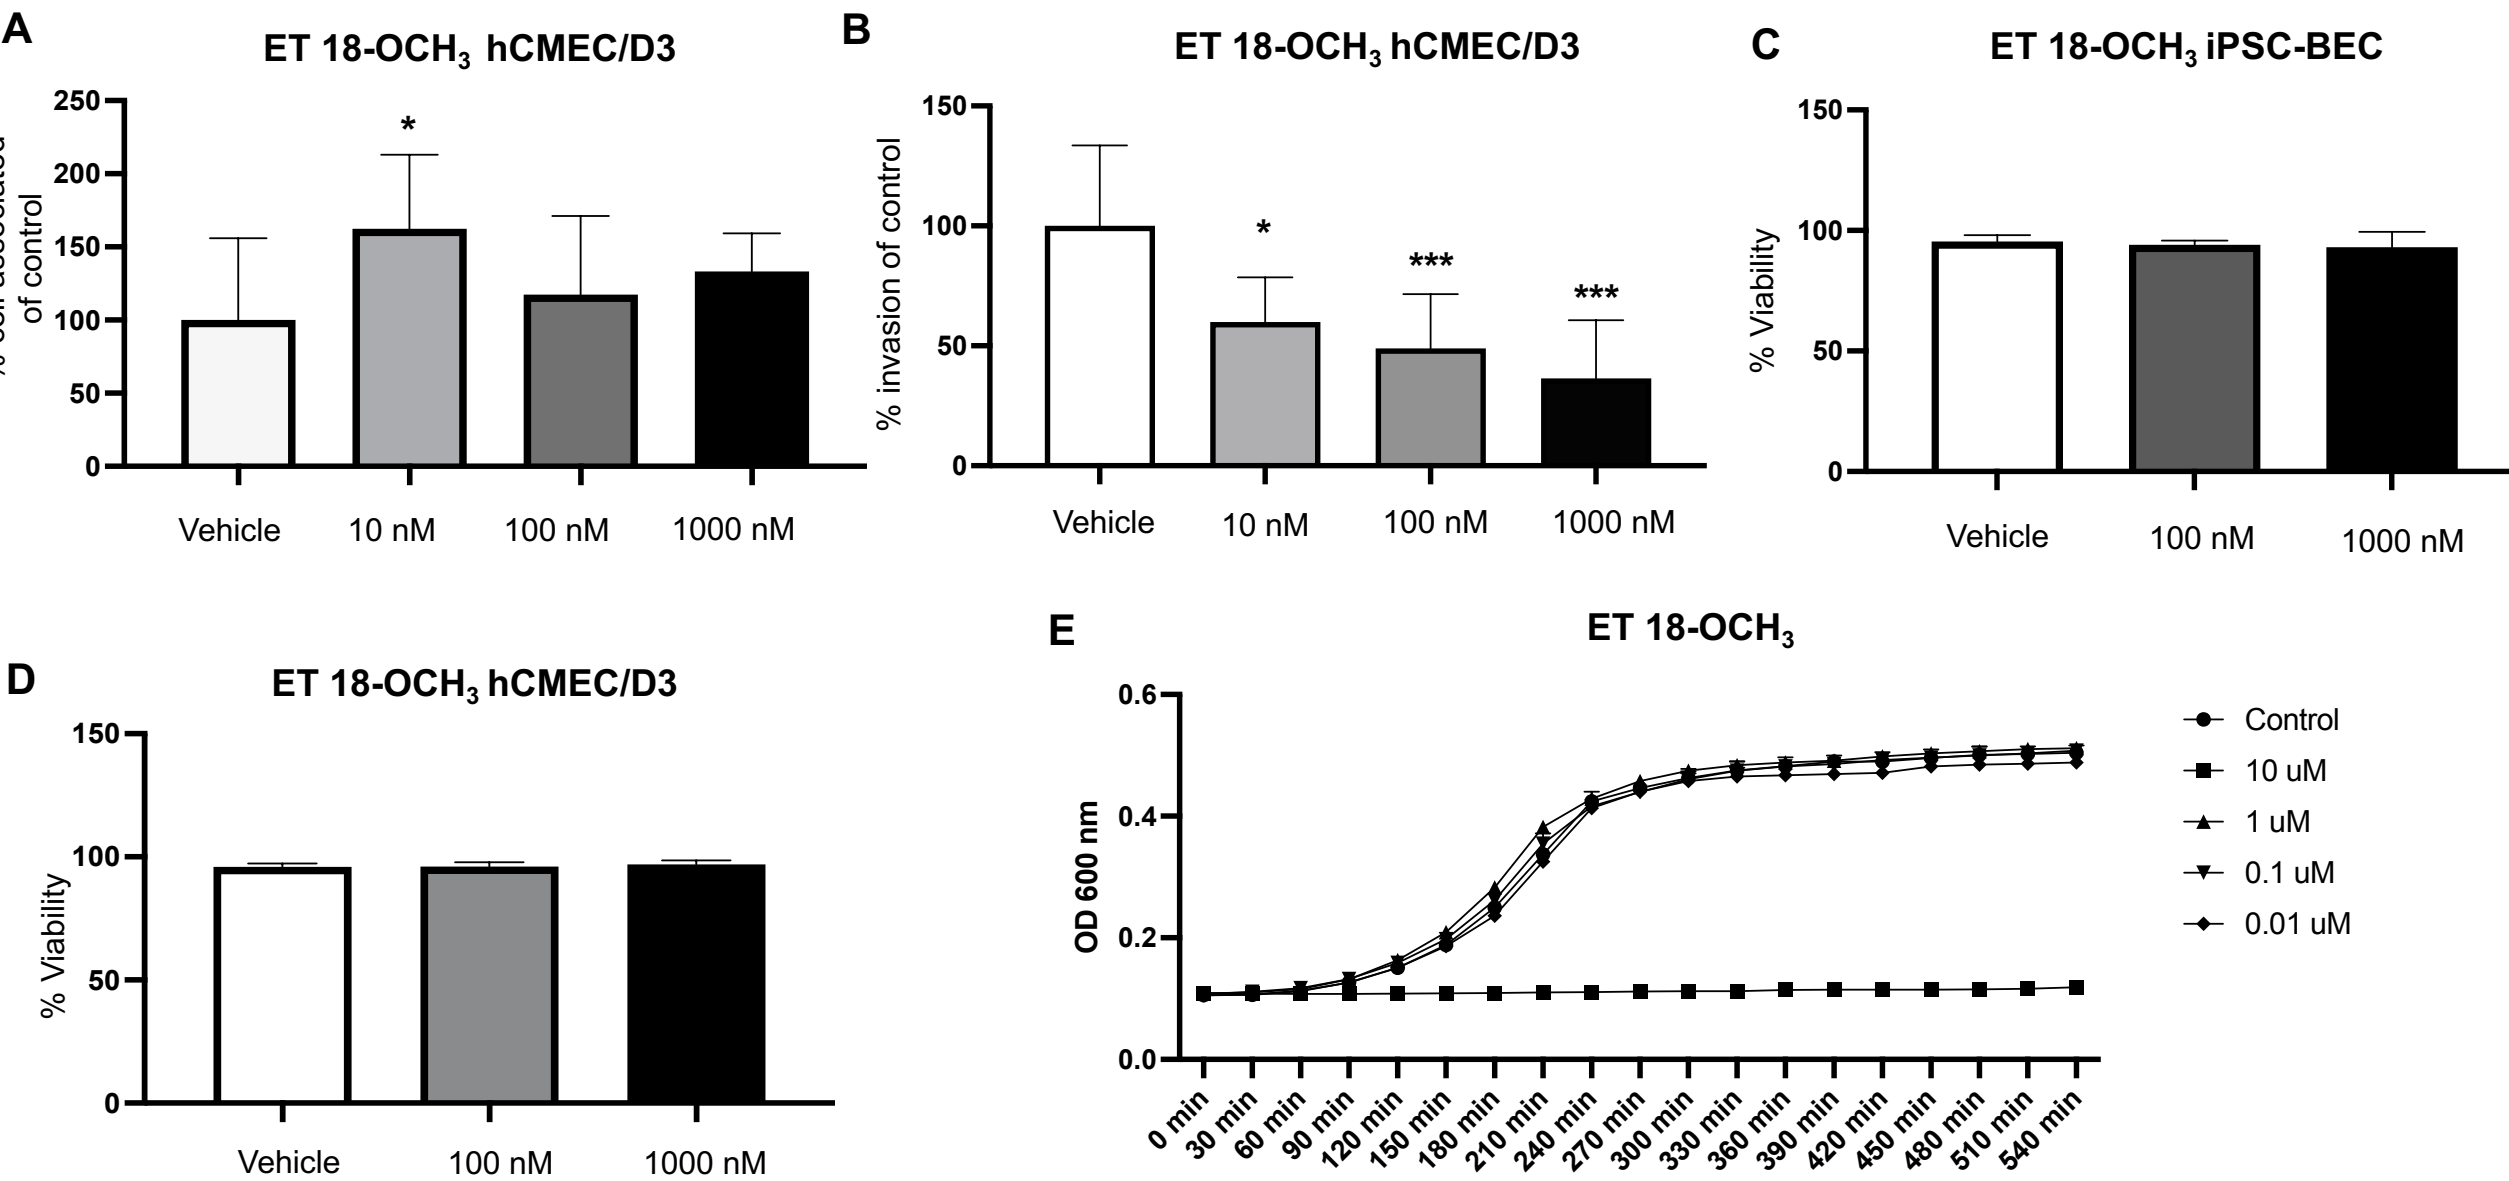

Supplement Figure S3

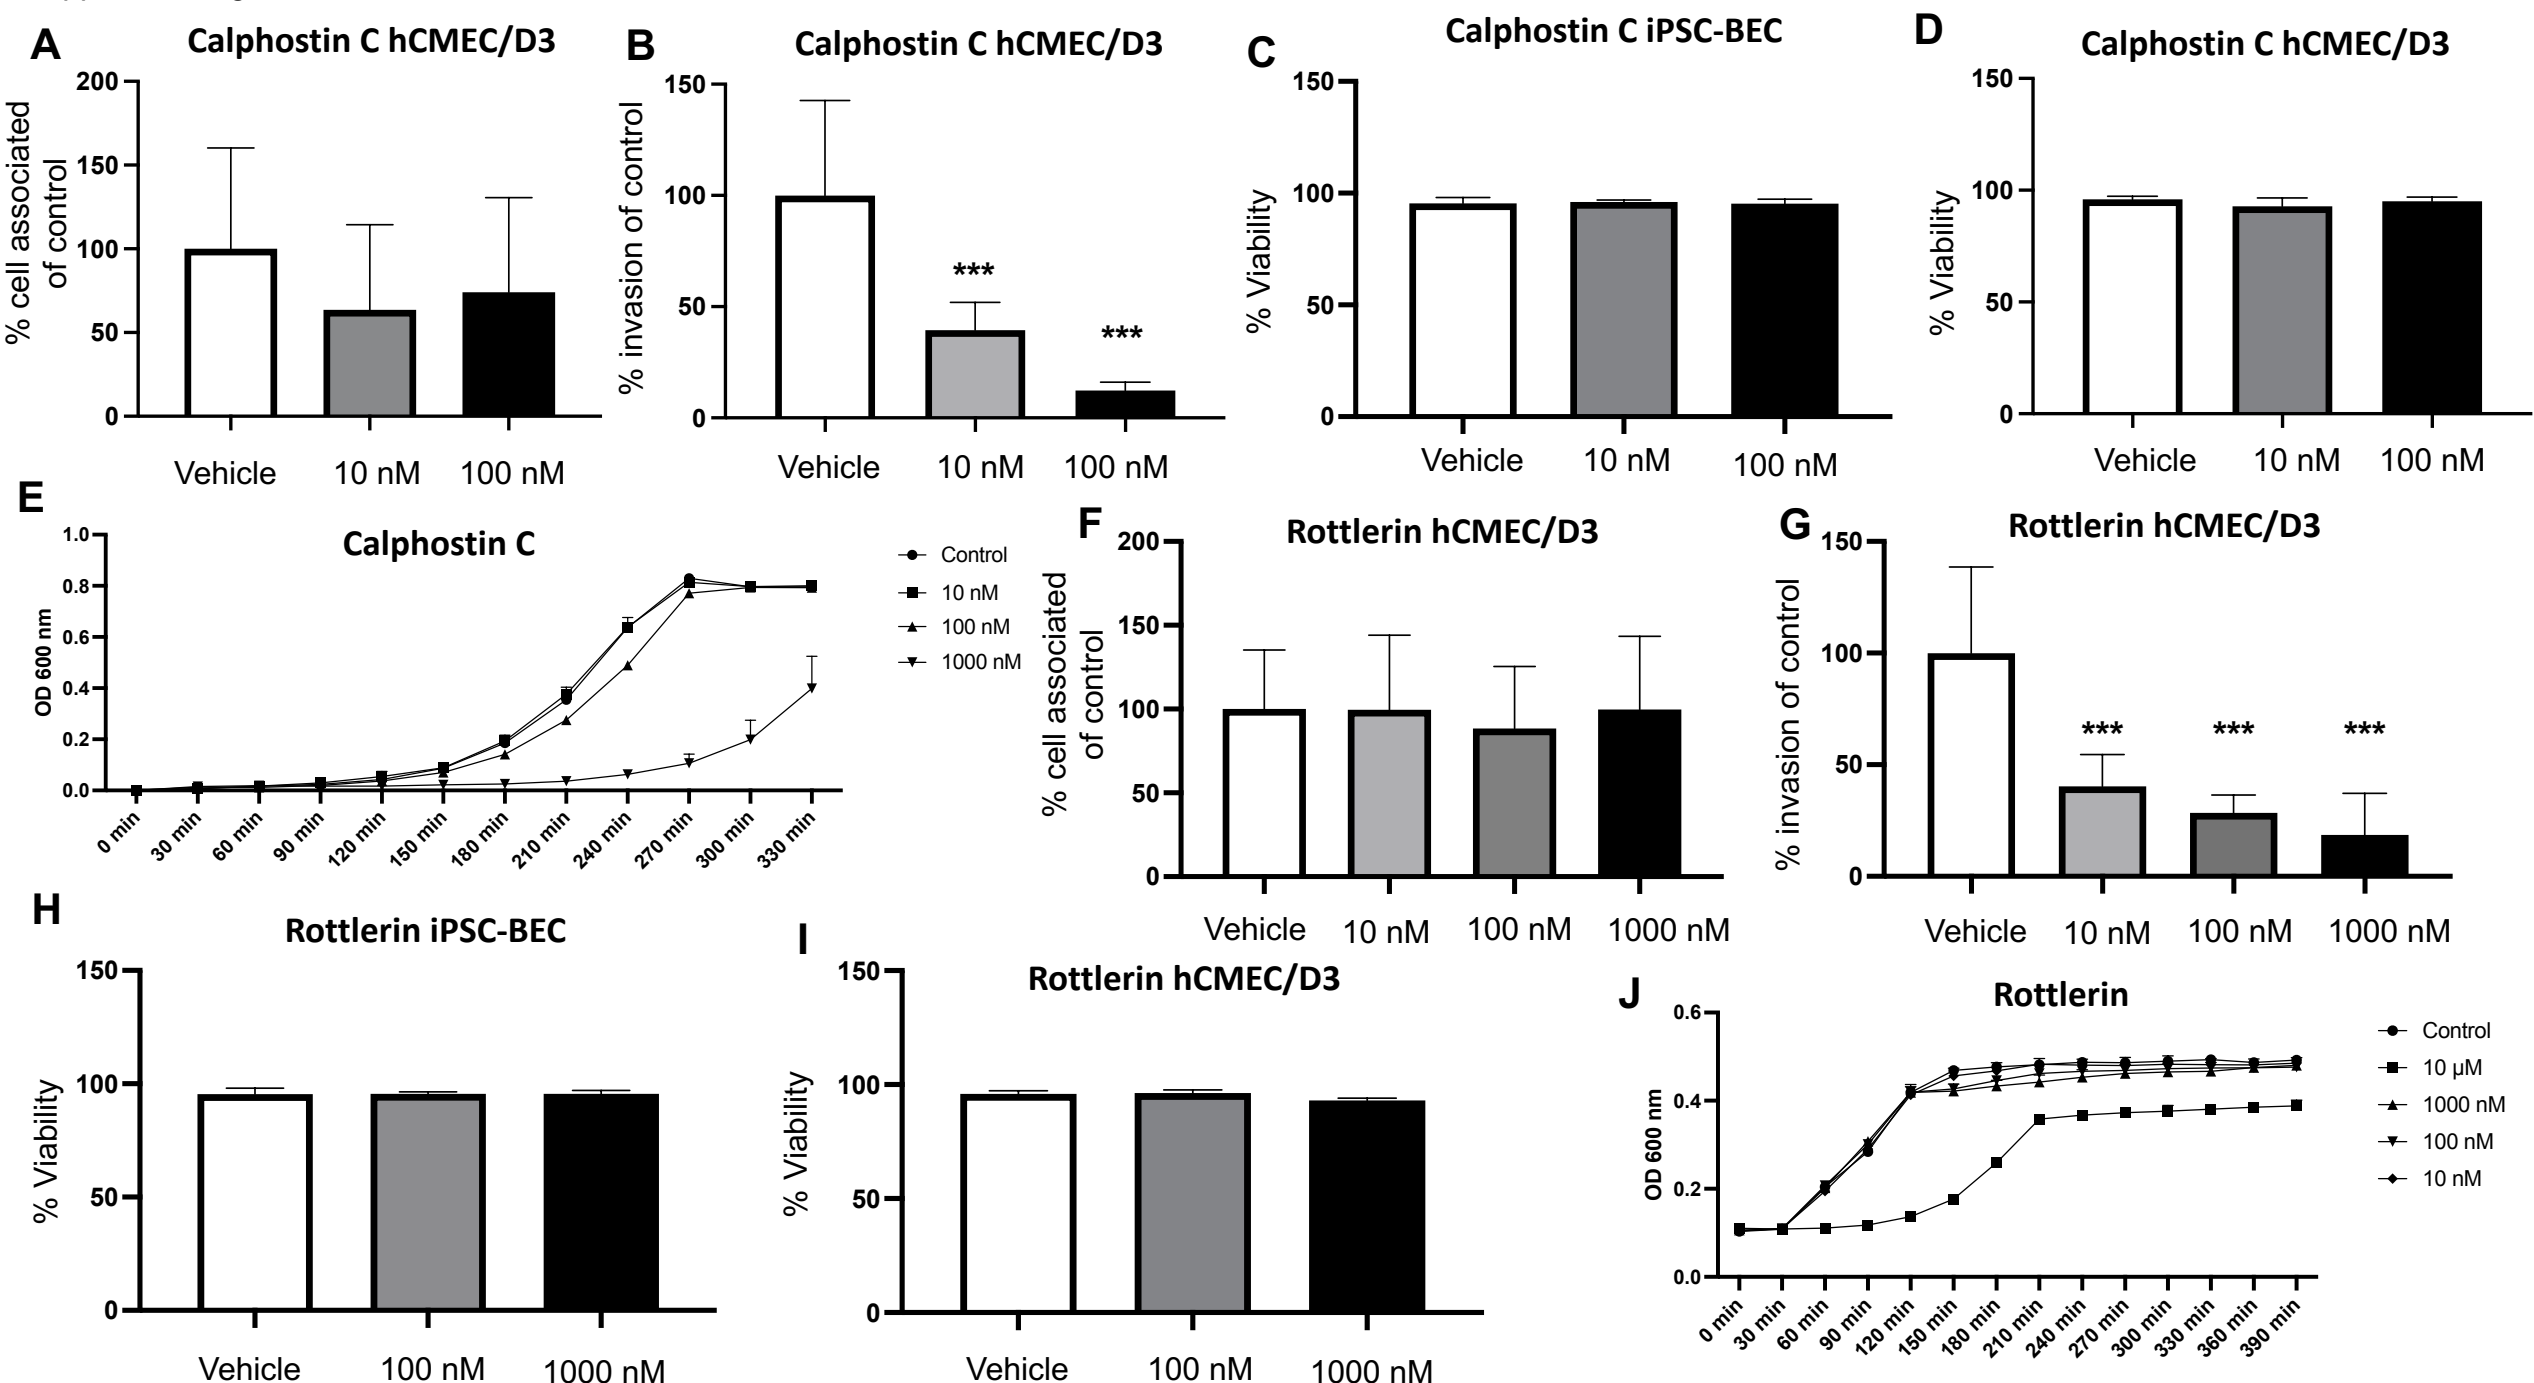

Supplement Figure S4

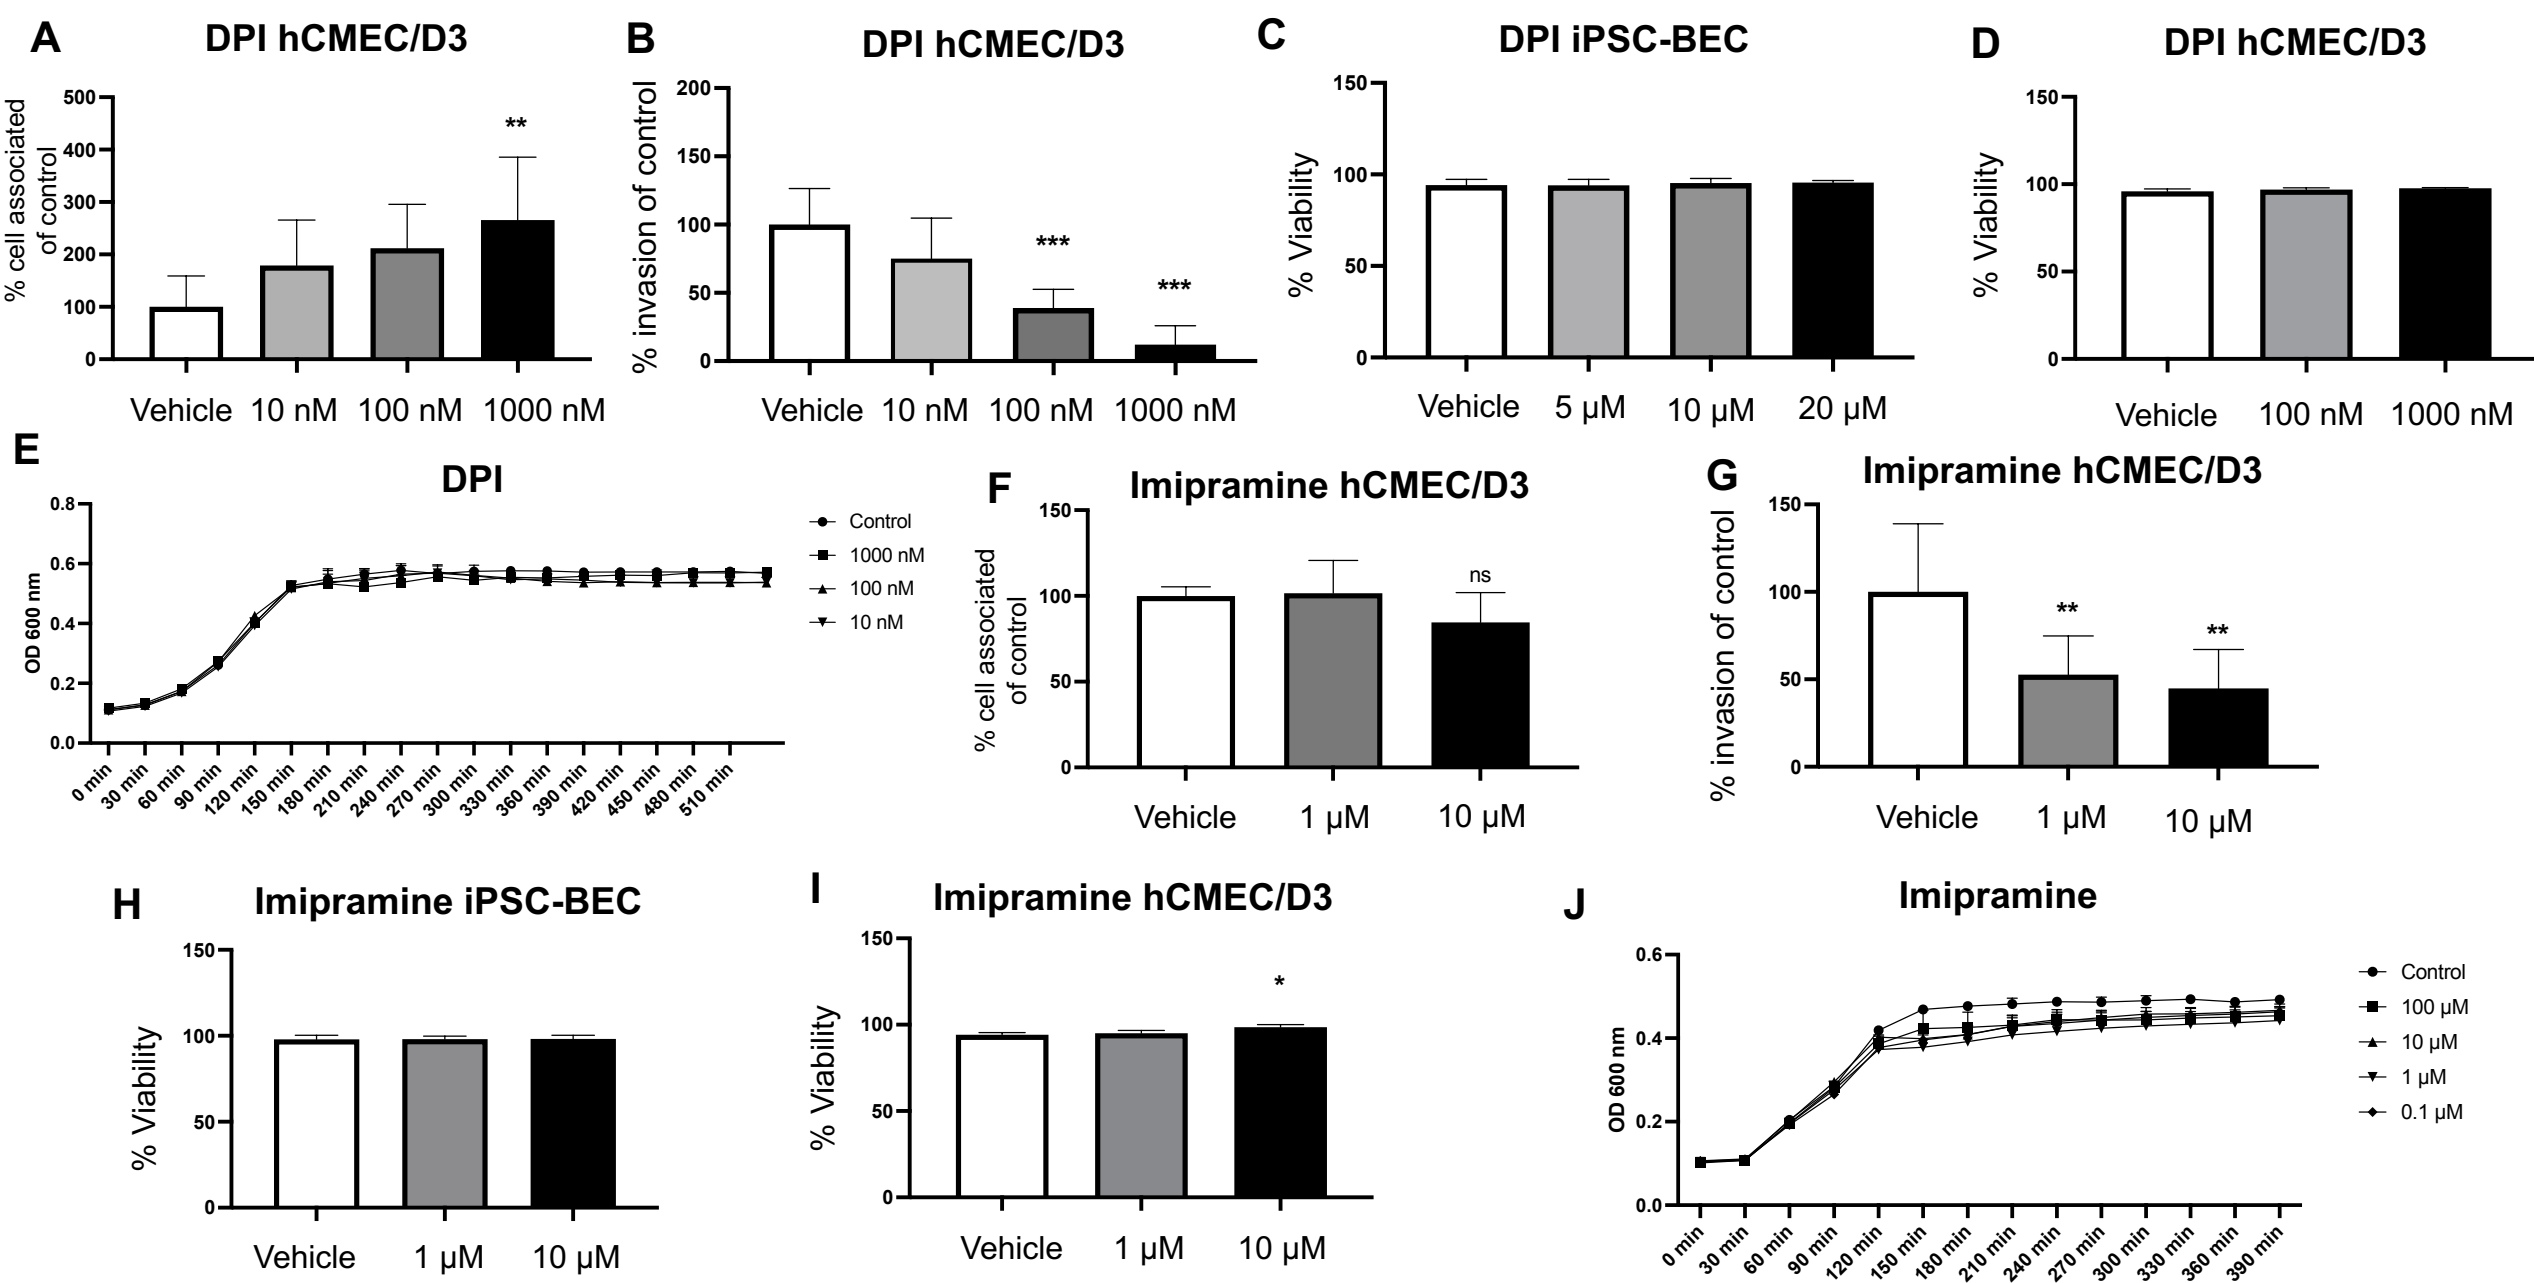

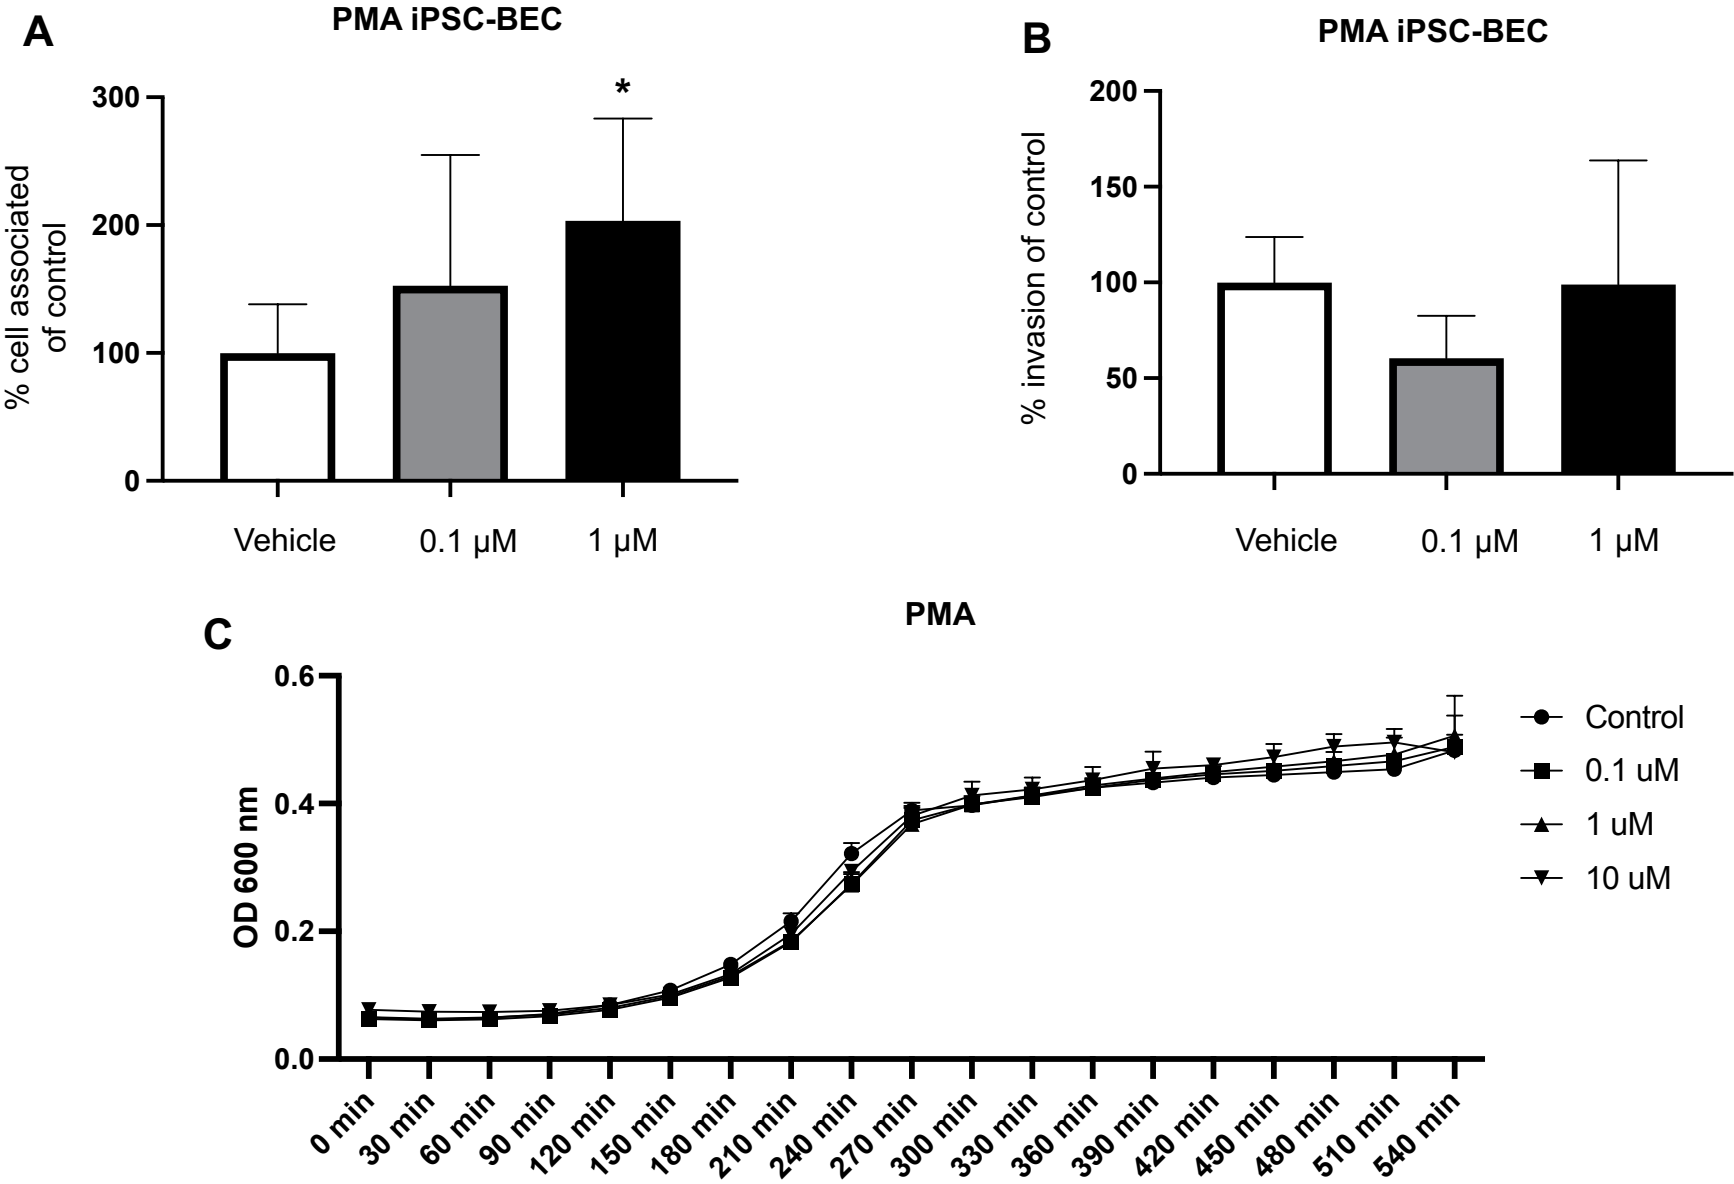

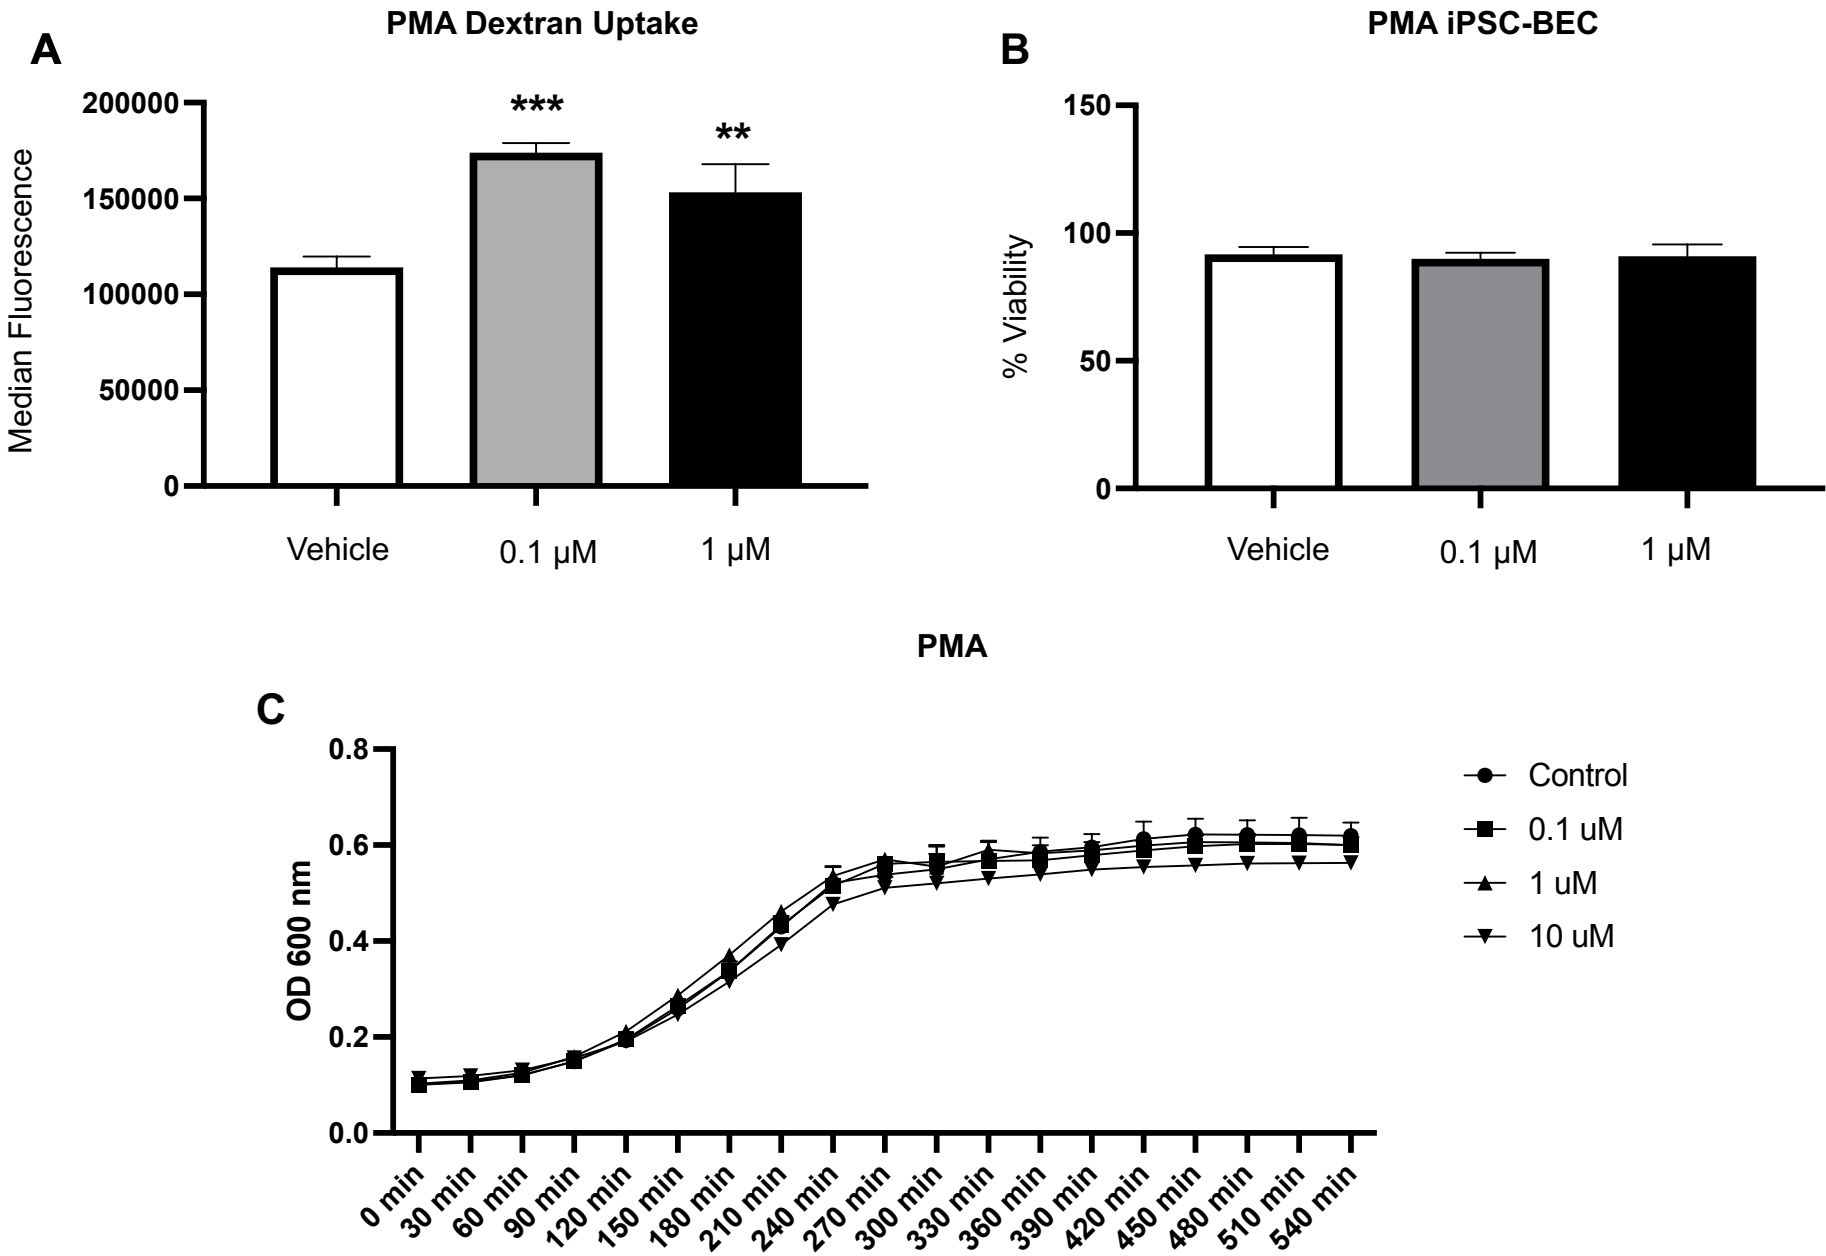

Supplement: s1 [file s1]
